# Supplementary material
Source: publisher figshare collection journal article supplement (https://sage.figshare.com/ndownloader/files/12738650)
Supplement: Supplementary file 1 [file 12738650]

### **Supplemental Figure 1**

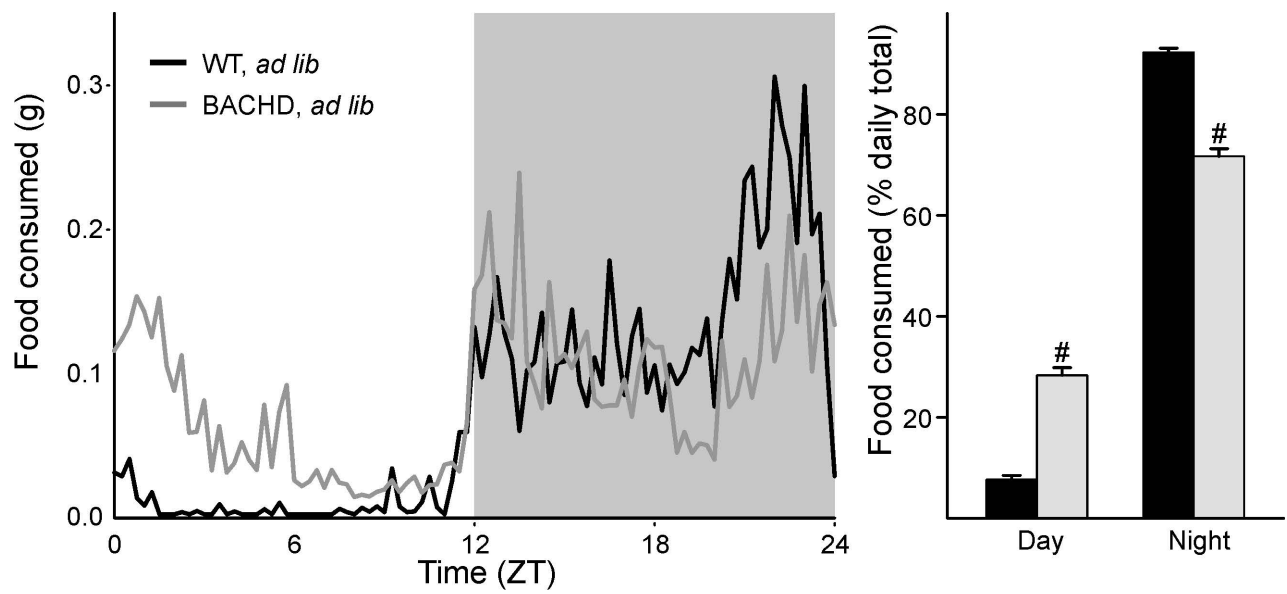

**Supplemental Fig. 1:** The temporal pattern of eating is altered in BACHD compared to WT controls (n = 5 per group). (Left) BACHD mice (grey) at 3 months of age show altered rhythms of food consumption compared to WT controls (black). (Right) The BACHD mice take significantly more food in the light (rest) phase than the WT controls.
